# Supplementary material for: Chromatographic Analyses, In Vitro Biological Activities, and Cytotoxicity of Cannabis sativa L. Essential Oil: A Multidisciplinary Study
Source: PubMed Central journal article supplement (PMC6320915; doi:10.3390/molecules23123266), 2018-12-10

## Supplementary material

# Chromatographic Analyses, In Vitro Biological Activities, and Cytotoxicity of *Cannabis sativa* L. Essential Oil: A Multidisciplinary Study

Gokhan Zengin <sup>1</sup>, Luigi Menghini <sup>2</sup>, Antonella Di Sotto <sup>3</sup>, Romina Mancinelli <sup>4</sup>, Francesca Sisto <sup>5</sup>, Simone Carradori <sup>2,\*</sup>, Stefania Cesa <sup>6</sup>, Caterina Frascchetti <sup>6</sup>, Antonello Filippi <sup>6</sup>, Letizia Angiolella <sup>7</sup>, Marcello Locatelli <sup>2</sup>, Luisa Mannina <sup>6</sup>, Cinzia Ingallina <sup>6</sup>, Valentina Puca <sup>8</sup>, Marianna D'Antonio <sup>9</sup> and Rossella Grande <sup>2,8</sup>

- <sup>1</sup> Department of Biology, Science Faculty, Selcuk University, 42130 Konya, Turkey; gokhanzengin@selcuk.edu.tr
- <sup>2</sup> Department of Pharmacy, University "G. d'Annunzio" of Chieti-Pescara, 66100 Chieti, Italy; luigi.menghini@unich.it (L.M.); marcello.locatelli@unich.it (M.L.); rossella.grande@unich.it (R.G.)
- <sup>3</sup> Department of Physiology and Pharmacology "V. Erspamer", Sapienza University of Rome, 00185 Rome, Italy; antonella.disotto@uniroma1.it
- <sup>4</sup> Department of Anatomical, Histological, Forensic and Orthopedic Sciences, Sapienza University of Rome, 00185 Rome, Italy; romina.mancinelli@uniroma1.it
- <sup>5</sup> Dipartimento di Scienze Biomediche, Chirurgiche ed Odontoiatriche, University of Milan, 20122 Milan, Italy; francesca.sisto@unimi.it
- <sup>6</sup> Dipartimento di Chimica e Tecnologie del Farmaco, Sapienza Università di Roma, 00185 Rome, Italy; stefania.cesa@uniroma1.it (S.C.); caterina.frascchetti@uniroma1.it (C.F.); antonello.filippi@uniroma1.it (A.F.); luisa.mannina@uniroma1.it (L.M.); cinzia.ingallina@uniroma1.it (C.I.)
- <sup>7</sup> Department of Public Health and Infectious Diseases, Sapienza University of Rome, 00161 Rome, Italy; letizia.angiolella@uniroma1.it
- <sup>8</sup> CeSI-MeT Centro Scienze dell'Invecchiamento e Medicina Traslazionale, Center of Aging Sciences and Translational Medicine, 66100 Chieti, Italy; valentina.puca@unich.it
- <sup>9</sup> Department of Clinical Microbiology and Virology, Spirito Santo Hospital Pescara, 65124 Pescara, Italy; dantoniomarianna2@gmail.com



Chromatogram for the Hemp EO (diluted 1:20 in *n*-hexane) with the relative peak of naringenin and its UV spectrum at maximum wavelength.

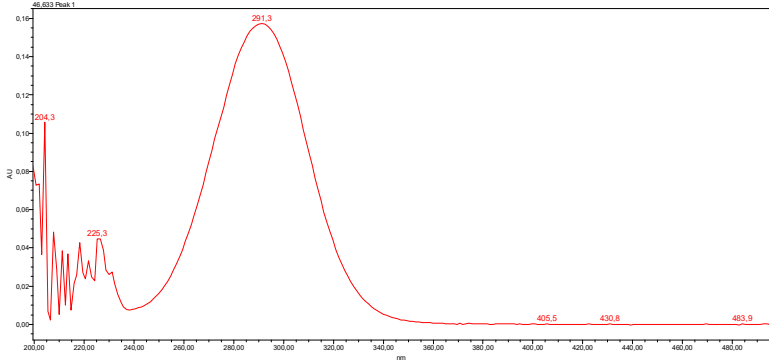

↑  $\lambda = 290 \text{ nm}$

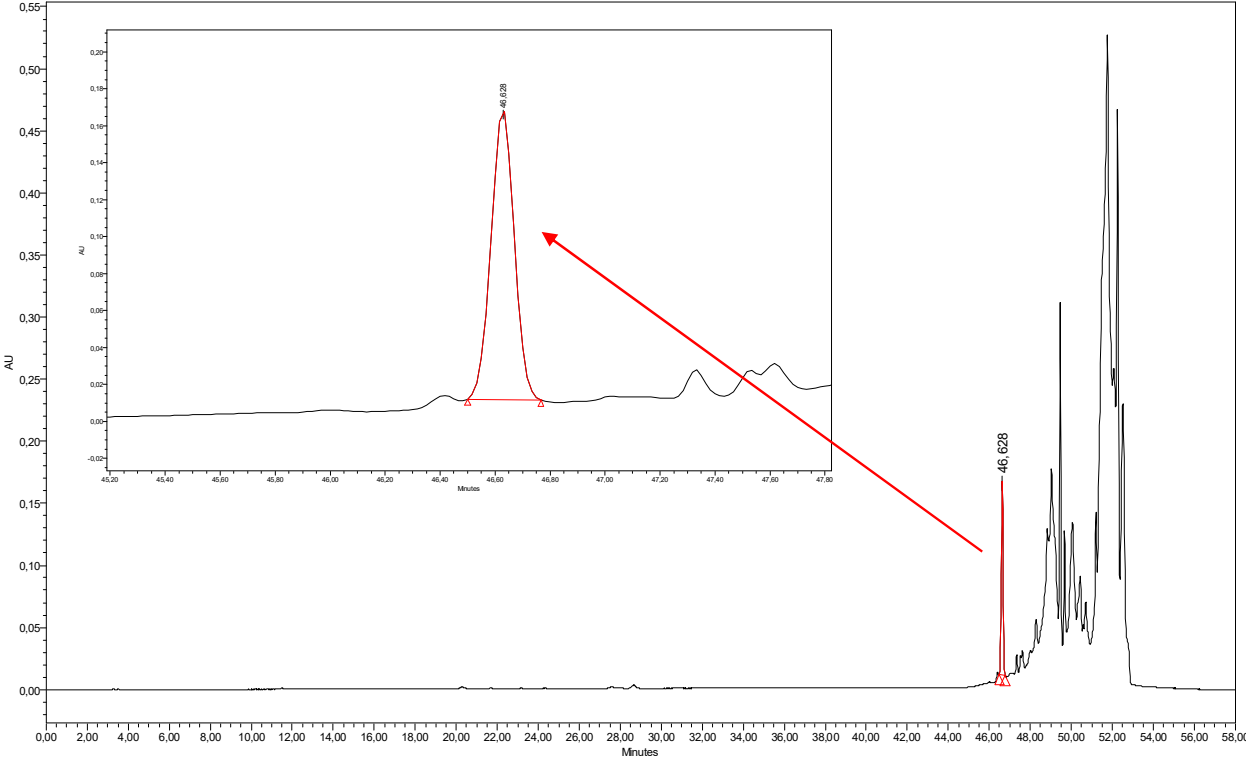

Chromatogram for the Hemp EO (diluted 1:5 in *n*-hexane) with the relative peak of naringenin and its UV spectrum at maximum wavelength.

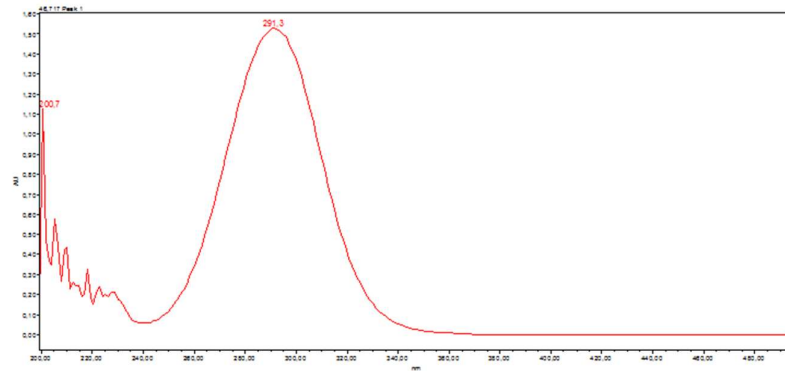

↑  $\lambda = 290 \text{ nm}$

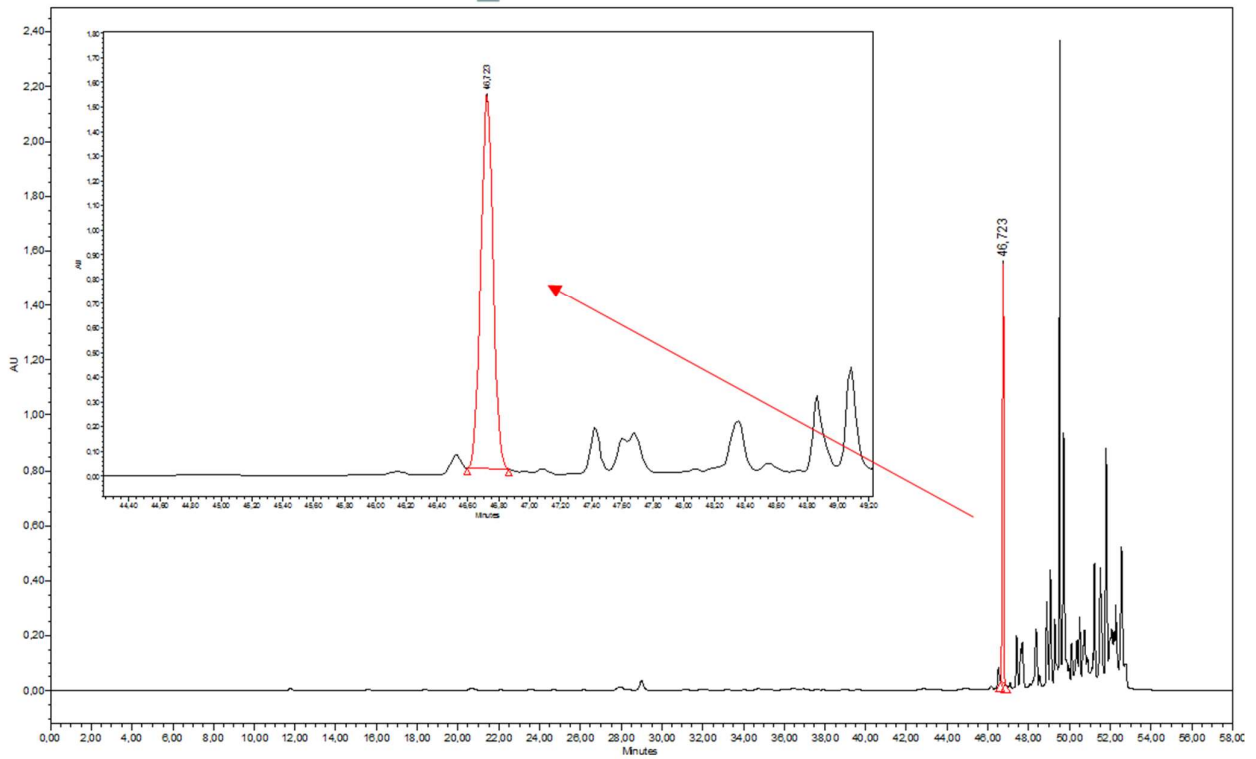

Chromatogram for the aromatic water with the relative peak of naringenin and its UV spectrum at maximum wavelength.

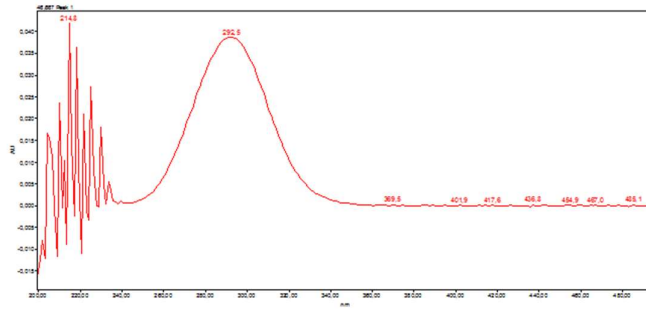

↑  $\lambda = 290 \text{ nm}$

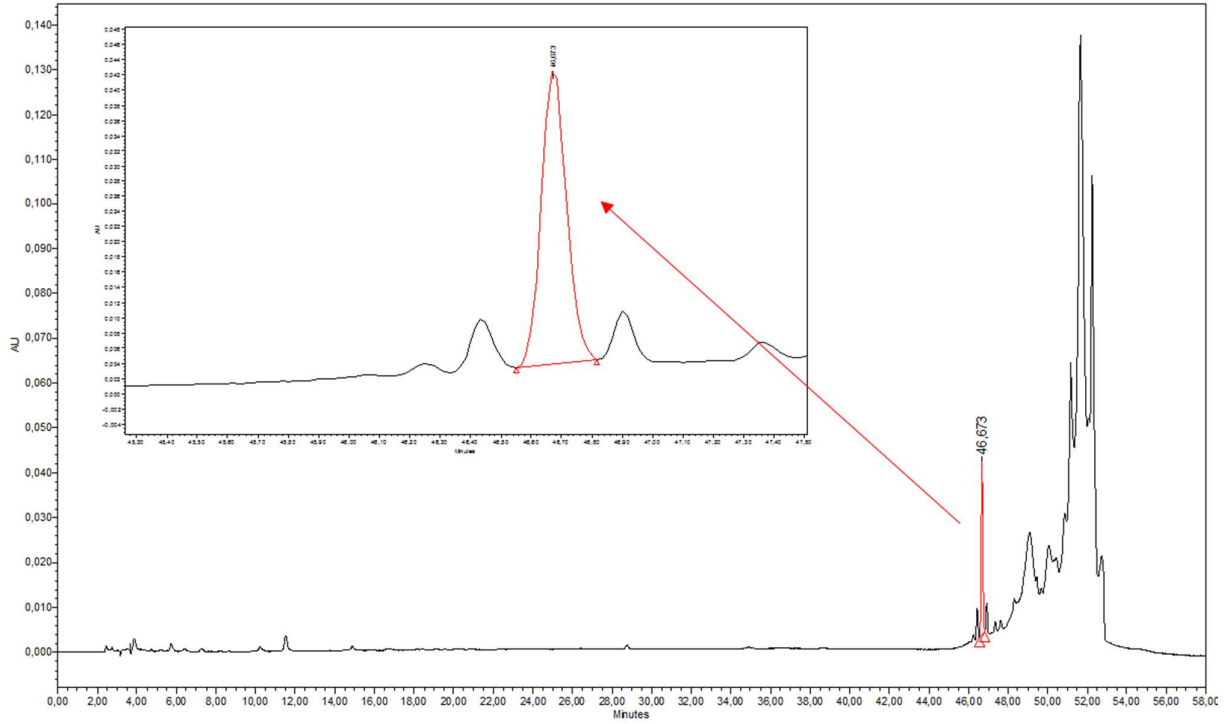

Supplement: molecules-23-03266-s001.pdf [file molecules-23-03266-s001.pdf]
